# 1 **EARLY INFLAMMATION, IMMUNOPATHOLOGY AND AGING**

2

3 Imroze Khan<sup>1\*</sup>, Deepa Agashe<sup>1</sup>, Jens Rolf<sup>2\*</sup>

4

5 <sup>1</sup>National Centre for Biological Sciences

6 Tata Institute of Fundamental Research

7 GKVK, Bellary Road

8 Bangalore, India 560065

9

10 <sup>2</sup>Freie Universität Berlin, Institute of Biology

11 Königin-Luise-Str. 1-3, 14195 Berlin-Dahlem

12

13 \*Correspondence

14 [imrozek@ncbs.res.in](mailto:imrozek@ncbs.res.in)

15 [jens.rolff@fu-berlin.de](mailto:jens.rolff@fu-berlin.de)

16

17 **ABSTRACT:**

18

19 Age-related diseases are often attributed to immunopathology, which results in self-  
 20 damage caused by an inappropriate inflammatory response. Immunopathology  
 21 associated with early-life inflammation also appears to cause faster ageing, although  
 22 we lack direct experimental evidence for this association. To understand the  
 23 interactions between ageing, inflammation and immunopathology, we used the  
 24 mealworm beetle *Tenebrio molitor* as a study organism. We hypothesized that  
 25 phenoloxidase (PO), an important immune effector in insect defence, may impose  
 26 substantial immunopathological costs by causing tissue damage, in turn accelerating  
 27 aging. In support of this hypothesis, we found that RNAi knockdown of PO  
 28 transcripts in young adults reduced inflammation-induced autoreactive tissue damage  
 29 to Malpighian tubules, and increased adult lifespan. Our work thus provides empirical  
 30 evidence for a causative link between immunopathological costs of early life  
 31 inflammation and faster ageing. We also reasoned that if natural selection weakens  
 32 with age, older individuals should display increased immunopathological costs  
 33 associated with an immune response. Indeed, we found that while old infected  
 34 individuals cleared infection faster than young individuals, they displayed exacerbated  
 35 immunopathological costs and higher post-infection mortality. RNAi-mediated  
 36 knockdown of PO response reduced immunopathology in older beetles and increased  
 37 their lifespan after infection. This is the first demonstration of a direct role of  
 38 immunopathological consequences of immune response during ageing in insects. Our  
 39 work is also the first report that highlights the pervasive role of immunopathology  
 40 under diverse contexts of aging and immune response.

41

42 **KEYWORDS:**

43 Ageing, infection, inflammation, immunopathology, Malpighian tubules

44

45 **INTRODUCTION**

46

47 Immunopathology refers to self-damage caused by an over-reactive immune system in  
 48 response to infection, and contributes to the pathology of several human diseases (1–  
 49 3). In insects, fast acting but nonspecific inflammatory responses are efficient against  
 50 invading pathogens, but they also lead to immunopathology (4). Cytotoxin-producing  
 51 effector systems like the phenoloxidase (PO) response pathway can also act against  
 52 host cells (4–6). However, the role of immunopathology in natural populations is still  
 53 unclear, with little information on whether or to what degree immunopathology  
 54 explains variation in host immune response or impacts fitness. It is important to  
 55 address these gaps, because immunopathology due to inflammatory responses can  
 56 have long-term implications. For instance, it was proposed that reduced inflammatory  
 57 exposure during childhood may have contributed significantly to increased lifespan in  
 58 modern human industrialized societies (7).

59

60 Recently, the impact of an early life immune response on faster ageing was studied  
 61 experimentally in the model insect *Tenebrio molitor* (8). The study predicted that  
 62 accelerated ageing is caused by immunopathological damage to Malpighian tubules,  
 63 fluid secreting epithelia that are functionally analogous to the human kidney (9, 10).  
 64 However, we lack direct experimental evidence for this hypothesis. The  
 65 phenoloxidase (PO) pathway, a fast acting immune effector in insects (11), is a likely  
 66 candidate to cause the observed tissue damage via cytotoxic intermediates in *T.*

67 *molitor* (12). Previous studies have already established a link between an over-active  
 68 PO response and increased mortality in *Drosophila melanogaster*. For instance, flies  
 69 that carried mutations in *serpin*-encoded spn27A failed to inhibit over-expression of  
 70 the PO response, and died faster due to excessive melanisation (13). Also, mutations  
 71 that inactivates a signaling serine protease (CG3066) in fruit flies– required for  
 72 activation of pro-PO – increased lifespan after *Streptococcus pneumoniae* infection  
 73 (14). Based on these results, we propose that the immunopathological damage to  
 74 Malpighian tubules caused by the PO cascade results in accelerated aging after early  
 75 immune response.

76

77 In most animals, ageing is associated with a progressive decline in immune function  
 78 leading to increased mortality and morbidity (15–17). Yet recent experiments seem to  
 79 contradict this. For example, in *D. melanogaster* different immune genes show age-  
 80 specific up-regulation- older fruit flies increased the expression of antimicrobial  
 81 peptides after infection (18) and harbored lower pathogen load (19). Similar results  
 82 were reported for the red flour beetle *Tribolium castaneum*, where ageing enhanced  
 83 multiple components of immunity such as hemolymph antibacterial activity and PO  
 84 response (20). However, despite this increased immune response with age, older  
 85 beetles are more likely to die from infection. This suggests a mismatch between  
 86 immune function and the ability to survive after infection, and questions whether the  
 87 observed age-related increase in immunity is beneficial. Instead, relaxed natural  
 88 selection in aged individuals (21, 22) may result in deregulation of the immune  
 89 system, increasing immunopathological costs. We hypothesize that immunopathology  
 90 associated with such a deregulated (over-reactive) immune response can directly  
 91 contribute to greater post-infection mortality with age.

To begin to understand the complex interplay between ageing, immune response and immunopathology, we conducted experiments with mealworm beetle *T. molitor*. We first investigated whether PO-mediated immunopathology during early life inflammation resulted in faster aging. We then tested whether older individuals experience increased immunopathological risk and whether this is also mediated by the same mechanisms as in early life inflammation.

## METHODS

All experiments were conducted with *T. molitor* females. We collected experimental beetles from an outbred stock population maintained at  $30 \pm 2^\circ\text{C}$  and supplied with an *ad libitum* diet of wheat bran and rat chow, supplemented with apple every 3 days. For all live infections, we used *Staphylococcus aureus* strain JLA513, a tetracycline resistant strain known to cause persistent infections in *T. molitor* (23). To produce inflammatory responses without pathogenesis, we used peptidoglycans (Sigma) derived from the *S. aureus* strain described above. We collected early pupae and determined their sex by observing the terminal abdominal segments. Upon eclosion, only females weighing between 120 and 150 mg were retained individually as virgins in grid box containers. All experimental females were thus controlled for age, mating status, and size. We used 7-day-old and 49-day-old individuals as ‘young’ and ‘old’ adults, respectively. We subjected both young and old females to experiments on the same day to enable a direct comparison between age classes.

# 116 Experiment 1: Impact of immunopathology associated with early immune activation 117 on ageing

## 118 (a) RNAi

119 To investigate whether reduced immunopathology minimizes the survival costs of  
120 early inflammation, we experimentally manipulated the degree of immunopathology  
121 during early life immune response and quantified survival. We used RNA interference  
122 (RNAi) to knock down expression of two proPO genes in 7-day-old virgin females: a  
123 previously sequenced *Tenebrio* proPO gene transcript (NCBI accession- AB020738.1;  
124 henceforth PO1 beetles) (24), and an ortholog to *Tribolium castaneum* proPO subunit  
125 1 (NCBI accession- NP\_001034493.1; henceforth, PO2 beetles). We amplified the  
126 internal region of the cDNA sequences encoding PO with T7-tailed primers (Table  
127 S1), and used them as templates to synthesize dsRNA using the T7 MEGAscript kit  
128 (Ambion) according to the manufacturer's instructions. We extracted the resulting  
129 RNA with phenol/chloroform, re-suspended it in sterile nuclease free Ringer solution  
130 (128mM NaCl, 18mM CaCl<sub>2</sub>, 1.3mM KCl, 2.3mM NaHCO<sub>3</sub> (23)), and stored it at -  
131 80°C until further use. We annealed the complementary strands by heating at 65°C for  
132 30 min and incubating at 22°C for an hour, before injecting 100ng purified dsRNA  
133 into each beetle. As RNAi control (or immune challenged control) (EI), we injected  
134 individuals with an internal region of the cDNA sequence encoding a lysozyme (Gm-  
135 Lys) from *Galleria mellonella* (Swiss-Prot accession- P82174), available in our lab  
136 (25). We monitored RNAi efficacy by performing qPCR (see supplementary  
137 information for qPCR methods and primers; Table S2). We used the comparative CT  
138 method (26) to estimate relative gene expression (see Fig. S1 & Table S3 for RNAi  
139 efficacy).

140

Two days after RNAi, we injected each beetle with 5µl peptidoglycan (concentration: 100ng in 1 ml of Ringer solution) to deplete the basal amount of PO in the hemolymph. Finally, after another 2 days, we challenged each beetle with a higher dose of peptidoglycan (5 µl; 5µg in 1 ml of Ringer solution) to induce a strong immune response. Following the immune challenge, a subset of beetles from all RNAi treatments (n = 30 beetles/ treatment) were monitored for total lifespan. Four days after immune challenge, the remaining beetles were either assayed for Malpighian tubule (MT) activity (n = 20-28 beetles/treatment) or phenoloxidase response (n = 16 beetles/treatment) (see below for methods). A set of 30 beetles served as unhandled full control (Control) that remained in the grid box container throughout the experimental window. In addition, as a procedural control (PC) for the impact of early-immune activation on adult life span, 30 beetles received ds-Lys injection (mock RNAi) followed by a mock immune challenge (with insect Ringer). Below, we briefly describe the methods for quantifying immunopathology and PO response.

(b) Malpighian tubule activity:

A prior study by Sadd and Siva-Jothy (12) used a modified ‘oil drop’ technique (27, 28) to demonstrate a large reduction in Malpighian tubule (MT) function due to immunopathology associated with immune induction. The method provides an *in vitro* functional estimate of the ability of isolated tubules to transport saline across the active cell wall into the tubule lumen. We estimated the fluid transporting capacity of MTs harvested from experimental beetles 4 days after immune challenge, as a proxy for immunopathology due to immune response. Each beetle has three pairs (dorsal, lateral and ventral) of large MTs of varying length but similar secretion rates (29). Hence, we dissected one tubule from each cold-anaesthetized animal under cold

sterile modified *Tenebrio* Ringer saline, prepared as described in Wiehart et al. (30). We severed the tubule at the point where it connects to the gut, and removed another ~0.5mm length from the open end (to control for the condition of the cut end). Following this, we transferred a single tubule per beetle to a 60 µl drop of sterile modified Ringer saline supplemented with 0.05% w/v phenol red to facilitate visualization, and 0.1mM L<sup>-1</sup> dibutyryl cyclic AMP to stimulate fluid secretion (12, 28). We covered the whole preparation with mineral oil (Sigma). Next, we pulled the open end of the tubule out of the saline drop and wrapped it around 0.1 mm pins (Fine Science Tools) in the mineral oil, where it secreted fluid. 6 hours later, we measured the volume of the secreted droplet, as well as the length of tubule that remained within the saline drop using ImageJ software. The volume of the secreted droplet is negatively correlated with the degree of immunopathological harm to Malpighian tubules.

179

(c) Phenoloxidase response:

We measured the PO activity of RNAi-treated beetles by measuring the rate of formation of dopachrome with a spectrophotometer (31). We mixed 2 µl undiluted hemolymph (collected from a wound between the head and thorax) with 8 µl PBS, and centrifuged the sample at 6500 rpm for 15 minutes at 4°C. We transferred 5 µl of the supernatant to a 96-well-microplate containing 20 µl PBS and 140 µl distilled water to measure activated PO enzyme (henceforth, PO activity). We then added 20 µl of L-Dopa substrate into each well, and transferred the plate immediately into a Microplate reader. We allowed the reaction to proceed at 30°C for 40 minutes, and then measured absorption at 490 nm once every minute. We quantified PO enzyme



190 activity as the slope of the linear phase (between 15 to 45 minutes) of the reaction in  
191 each well (Vmax: change in absorbance per minute).

192

# 193 Experiment 2: Impact of ageing on immune function and post-infection survival

194

195 We grew a *S. aureus* culture overnight in liquid LB medium to an OD<sub>600</sub> of 95%. We  
196 then centrifuged the culture, washed the pellet three times before re-suspending in  
197 insect Ringer solution. We injected 5 µl of this suspension directly into the haemocoel  
198 of each individual (approximately  $4 \times 10^6$  CFUs- colony forming units- per inoculum;  
199 see (23)). Control individuals were injected with 5 µl of Ringer solution. After  
200 infection, we redistributed beetles individually into grid boxes under standard  
201 conditions with access to food. For a subset of beetles (n = 15-17 beetles/ age group/  
202 treatment), we monitored individual survival daily at 8pm for 40 days. Another subset  
203 was tested for clearance of *S. aureus* infection from hemolymph after 6 hours, 1 day,  
204 7 days and 14 days. At each time point, we harvested bacterial cells from a group of  
205 9-11 individuals to estimate remaining CFUs per beetle using the perfusion bleeding  
206 method described by Haine and colleagues (23). Briefly, perfused hemolymph was  
207 collected from each beetle and plated on LB agar containing 5µg/ ml tetracycline as a  
208 selective agent. The number of colonies observed after 48 hours of incubation at 30°C  
209 should be negatively correlated with the ability to clear bacterial infection.

210

211 Next, we tested whether induced hemolymph antimicrobial activity against *S. aureus*  
212 cells differed across beetle age groups (n = 9-13 beetles/ infection treatment/ age  
213 group), using an *in vitro* cell killing reaction as described in Haine et al. (23). We  
214 collected 2 µl of undiluted hemolymph sample as described above, diluted it with 48

215  $\mu$ l PBS and 2  $\mu$ l of an overnight culture of *S. aureus* (approximately  $10^6$  CFU), and  
 216 incubated at 30°C with shaking at 150 rpm for 2 hours. Following this, we diluted the  
 217 mixture 800 times and plated out as described above. The number of CFUs that  
 218 appeared was counted after 48 hours incubation at 30°C. The number of colonies  
 219 observed was used as a measure of (inversely related to) the strength of induced anti-  
 220 *S. aureus* activity of the beetle hemolymph.

221  
 222 Finally, we measured PO response (n = 30 beetles/age group) and estimated relative  
 223 expression of the antimicrobial peptide-coding genes *attacin 2* and *tenecin 1* (n = 5-6  
 224 pairs/ age group/ gene; see Table S2 for qPCR primer sequences) as a function of age  
 225 in naïve beetles as described earlier. Since these assays were performed with  
 226 uninfected beetles, they served as an estimate of age-associated changes in baseline  
 227 constitutive innate immune function in the absence of immune induction.

228

### 229 Experiment 3: Impact of ageing and infection on immunopathology

230

231 Beetles from both age groups (7-day-old vs. 49-day-old) were first infected (or sham-  
 232 infected) as described earlier (n = 11-14 beetles/ age-group/ infection status). Four  
 233 days later, we estimated MT function as a proxy for immunopathology (see  
 234 experiment 1 for methods). We also manipulated the impact of bacterial infection on  
 235 MT activity and tested whether reducing damage to MTs can rescue the low post-  
 236 infection survival of older beetles. To this end, we injected 45-day-old beetles with 5  
 237  $\mu$ l of dsRNA (100ng/ $\mu$ l) of PO1 or Lys (n = 27-34 beetles/ RNAi treatment) as  
 238 described in experiment 1. Two days later, we infected beetles as described above.  
 239 We monitored a subset of individuals for their post-infection survival daily at 8 pm

240 for 25 days (n = 15-18 beetles/ RNAi treatment). The remaining individuals were  
241 tested for MT activity as described above to quantify immunopathology (n = 12-16  
242 beetles/ RNAi treatment).

243

#### 244 Data analysis

245

246 Residuals of bacterial clearance data were not normally distributed (tested with  
247 Shapiro-Wilks test). Hence, we log-transformed the data, and confirmed that the  
248 transformed residuals were normally distributed. Following this, we used a two-way  
249 or one-way ANOVA to test the following effects: (a) Bacterial clearance as a function  
250 of age and assay time (b) PO response of early-infected beetles as a function of RNAi  
251 treatments. We tested for pairwise differences between treatments after correcting for  
252 multiple comparisons, using Tukey's HSD. Non-normally distributed data that could  
253 not be transformed to a normal distribution were analyzed using nonparametric  
254 Wilcoxon Rank Sum tests: (a) MT activity after early-immune response as a function  
255 of RNAi treatments (b) antimicrobial activity as a function of age (analyzed  
256 separately for sham infected and infected beetles) (c) PO response as a function of age  
257 (d) MT activity as a function of age and infection (e) MT activity of older beetles as a  
258 function of RNAi treatments. Here, we used a Steel-Dwass test to estimate pairwise  
259 differences.

260

261 We used Cox Proportional Hazard survival analysis to test the following effects: (A)  
262 beetle survival after infection as a function of age and infection (B) post-infection  
263 survival of old beetles as a function of RNAi treatments. We did not have any  
264 censored values while analyzing the data, as all beetles died within the experimental

265 window. We calculated the impact of treatment (e.g. infection or RNAi) as the  
 266 estimated hazard ratio of experimental vs. control group (hazard ratio = rate of deaths  
 267 occurring in experimental group/ rate of deaths occurring in control group). A hazard  
 268 ratio significantly greater than one indicates an increased risk of mortality in the  
 269 experimental group compared to control individuals.

270

271 We analyzed median and maximum lifespan to measure the change in ageing rate  
 272 following early-life immune activation. We used accelerated failure time (AFT)  
 273 models (32) to examine the median lifespan in R using the ‘survival’ package, with  
 274 each model separately analyzing the difference in median lifespan between a  
 275 treatment and unhandled control group. We also compared knockout (PO1 and PO2)  
 276 and early immune challenged control (EI) beetles to analyze whether PO knockdown  
 277 increased lifespan after an early immune response. We found that the Weibull  
 278 distribution minimized the AIC value (Akaike’s Information Criterion) of AFT  
 279 models, and was thus most appropriate to use for each comparison. For each model,  
 280 we estimated the c-parameter (exponential (estimated coefficient associated with  
 281 lifespan)) representing the difference in median lifespan between the two groups, as  
 282 suggested by Swindell (32). A c-parameter value significantly less than 1 indicates  
 283 reduction in lifespan and vice-versa. For a given comparison, the value  $100(c - 1)$   
 284 represents the percent change in median lifespan of the experimental vs. control group  
 285 (33).

286

287 Maximum lifespan has been suggested as an important indicator of the ageing process  
 288 (34); hence, we used it to test the impact of early immune response on ageing. We  
 289 first estimated the 90th percentile lifespan when all treatments were combined, and

290 then calculated the percentage of beetles in each treatment group living until this time.  
 291 We then performed exact unconditional tests using a contingency table approach to  
 292 compare percentage survival of each treatment group with unhandled control beetles  
 293 ([www.stat.ncsu.edu/exact](http://www.stat.ncsu.edu/exact)). We also compared RNAi-treated beetles and immune  
 294 challenged control beetles (i.e. PO1 or PO2 vs. EI) to test whether PO knockdown  
 295 increased maximum lifespan significantly. We used a binomial, two-way model to  
 296 generate a pooled z-score test p-value for each comparison. To obtain the treatment  
 297 effect for each comparison, we divided the percentage survival of experimental  
 298 groups by that of the respective controls.

299

## 300 **RESULTS:**

301

### 302 Phenoloxidase response after early inflammation increases mortality and organ 303 damage

304

305 We found that an early immune challenge in young adults caused an increase in PO  
 306 response (Fig. 1A, Table S4A), with a concomitant reduction in MT activity (Fig. 1B,  
 307 Table S4B). We further observed that RNAi knockdown of the PO response reduced  
 308 MT damage in immune-challenged beetles, resulting in a limited reduction of fluid  
 309 secretion rate (compare Fig. 1A & B, Table S4A & B). An AFT model showed that  
 310 early immune challenged beetles also had shorter lifespans compared to full control  
 311 and procedure control beetles (Figures 2A & B, Table S5A). We did not detect  
 312 mortality until 16 days following the immune challenge, suggesting that early immune  
 313 challenge did not have an immediate impact on survival (Figure 2A). The c-parameter  
 314 was lowest in immune challenged control (EI) beetles, suggesting a reduction in  
 315 median lifespan (percent decline with respect to full control,  $100(c-1)$ : ~35%)

316 following an early-life immune response (Figure 2B, Table S5A). The negative  
 317 impact of an early immune challenge on beetle lifespan could also be reversed by  
 318 RNA interference of proPO transcripts (e.g. PO1 and PO2) in immune challenged  
 319 beetles (Figure 2A & B, Table S5A). RNAi of both the transcripts extended the life  
 320 span by ~31-32 % compared to immune challenged control (EI) beetles (Figure 2B,  
 321 Table S5A).

322

323 Analysis of maximum lifespan produced similar results as that of median lifespan.  
 324 The 90th percentile of overall survival time was 74 days (pooling all individuals  
 325 across treatments); the percentage of immune challenged individuals surviving to this  
 326 time was significantly lower than control groups (EI = 3%, PO1 = 10%, PO2 = 10%,  
 327 PC = 23%, Control = 27%; also see Figure 2C & Table S5B for treatment effects).  
 328 These data suggest acceleration in ageing due to early-life immune response (compare  
 329 90<sup>th</sup> percentile survival for each experimental group: FC = 79.5; PC = 83.1, EI = 57.6;  
 330 PO1 = 73.8, PO2 = 73.8). Finally, we found that RNAi knockdown of the PO  
 331 response significantly increased maximum lifespan compared to immune challenged  
 332 EI beetles with normal PO levels, suggesting delayed ageing in knockout groups  
 333 (compare ageing acceleration in Figure 2C, Table S5B).

334

### 335 Immune responses increase with age

336

337 We found a rapid clearance of bacterial cells in both young and old beetles: ~98%  
 338 cells were removed within 6 hours after infection. However, older individuals showed  
 339 consistently lower bacterial loads across different time points (i.e. 6 hours, 24 hours, 7  
 340 days and 14 days) after infection (Fig 3A, Table S6A). Next, we tested the ability of

cell-free hemolymph to kill *S. aureus* cells 1 or 7 days after infection with live bacteria (or sham infection). We found that hemolymph from older infected beetles showed a significantly higher antibacterial response compared to younger beetles (Fig 3B, Table S6B). In contrast, age did not have a strong influence on the antibacterial activity of cell-free hemolymph from sham-infected beetles (Figure S2, Table S6B). Older beetles also showed an enhanced PO response (Fig 3C, Table S6C) and higher expression of the antimicrobial peptides *attacin* and *tenecin 1* (Fig. 3D, Table S3), even in the absence of a previous bacterial infection.

#### Older beetles die faster after bacterial infection

To test if an age-related increase in immunity also confers greater survival benefits, we tested the impact of *S. aureus* infection on the survival of young vs. old beetles. Compared to young beetles, we found that old beetles died much faster after an infection (Hazard ratio: Sham-infection vs. infection in old beetles = 12.59,  $P < 0.001$ ; Sham-infection/ infection in young beetles = 5.18,  $P < 0.001$ ; Figure 3E, Table S6D). In contrast, beetle age did not alter the survival of sham-infected beetles significantly (Figure 3E, Table S6D).

#### Increased immune response impairs Malpighian tubule activity via immunopathology

We found that ageing itself reduced the baseline MT activity in sham-infected beetles. Bacterial infection impaired the fluid transport ability of MTs in both age groups, but the relative impact of infection was much larger in infected older beetles (~95.1% reduction, compared to a 74% reduction in young beetles) (Fig. 3F, Table S7A). As

observed for early immune-challenged beetles, we found that RNAi mediated knockdown of pro-PO1 partially rescued the MT activity of infected older beetles (Fig. 3G, Table S7B), and proPO1 knockdown beetles survived longer after infection than wild-type beetles (Hazard ratio: knockout vs. infected wildtype beetles = 0.396;  $P = 0.01$ ) (Fig. 3H, Table S7C). We thus suggest that bacterial infection induced immune upregulation in older beetles, but incurred greater immunopathological damage to MTs, resulting in greater mortality despite higher immune function.

## DISCUSSION:

In the work presented here, we evaluated the importance of immunopathology in the diverse contexts of ageing and immune response in the model insect *T. molitor*. We first show that early-life inflammation leads to faster ageing. Early-life immune activation (without the direct cost of a live and replicating pathogen) was sufficient to inflict immunopathological damage on Malpighian tubules (MTs), a vital insect organ that is functionally equivalent to the vertebrate kidney. Subsequently, we demonstrated that experimental suppression of the phenoloxidase (PO) response reduced the immunopathological damage to MTs and improved survival. These results highlight that a greater collateral damage to vital organs by PO is indeed one of the mechanisms that cause accelerated death of older beetles after early life inflammation. Although our work focuses on an insect system, it provides the first empirical support for the proposed link between childhood inflammation, immunopathology and reduced human lifespan (7). Next, we describe the immunopathological risk associated with an ageing immune system and its impact on the lifespan of older individuals. While ageing increased several aspects of beetle



immunity such as PO response, antimicrobial peptide gene expression, induction of hemolymph antibacterial activity and the ability to clear *S. aureus* infection, it also severely impaired MTs and compromised the ability to survive after bacterial infection. We found that RNAi knockdown of the PO response once again minimised immunopathological damage to MTs of old beetles, partially rescued fluid transport ability and extended adult lifespan after infection. Thus, one of the most interesting implications of our work is the pervasive role of immunopathological damage to MTs that underlies the effects of early immune activation as well as the later impacts of infection.

In a prior study, Ayres and Schneider had predicted a direct role for PO response pathway in immunopathological damage and increased post-infection mortality of fruit flies (14). Our data not only support this prediction, but also reveal impaired MT activity as an important mechanism underlying the immunopathological consequences of the PO response and associated reduction in lifespan. We note that other components of the immune system can also be involved in immunopathology, and the PO pathway may not be the sole determinant of immunopathology. For instance, the Tumor Necrosis Factor-like protein encoded by the gene *eiger* is known to cause immunopathology in fruit flies (35). NF- $\kappa$ B signaling, which is involved in chronic inflammation in vertebrates (36), may also cause immunopathology in insects, though it is poorly studied. We thus suggest the need for further studies to test the fitness impacts of immunopathology caused by other immune effectors.

Another important finding of our study is a mechanism to explain the discordance between immune response and the host fitness post-infection (i.e. the ability to

416 survive after bacterial infection), reported in this study as well as in flour beetles (20)  
 417 and fruit flies (37, 38). Such a mismatch suggests that the inherent ability to mount an  
 418 immune response is not a reliable predictor of host fitness after infection. Our data  
 419 suggest that these contradictory results may be mediated via a large reduction in MT  
 420 activity in infected older individuals. As a result, old beetles may pay greater  
 421 immunopathological costs of increased immune activation compared to young beetles.  
 422 In fact, several studies in vertebrates show that ageing leads to chronic inflammatory  
 423 responses via maladaptive impacts of the innate immune system, contributing to the  
 424 pathology of several age-related illnesses (17, 39). An exaggerated inflammatory  
 425 response with age can induce lethal immunopathology in mice: old individuals die  
 426 faster due to hepatocyte necrosis caused by an elevated level of interleukin-17 and  
 427 neutrophil activation (36). Another study found increased post-infection mortality in  
 428 older mice with suppressed anti-inflammatory cytokine interleukin-10 expression,  
 429 suggesting a link between overactive inflammatory responses and increased risk of  
 430 mortality (40). Thus, we suggest that the observed increase in beetle immunity with  
 431 age represents immune activation at an unnecessarily high level (characteristic of pro-  
 432 inflammatory profile with age in vertebrates) without any adaptive value. Instead,  
 433 ageing leads to a dramatic increase in the negative impacts of inflammation, and the  
 434 net impact of the immune response compromises old individuals' ability to survive  
 435 after infection. Ageing may also reduce tolerance to infection, the ability to limit  
 436 negative impacts of pathogens, or self-damage (39). Consequently, older individuals  
 437 may increasingly rely on direct immune activation to limit pathogen burden, which  
 438 could rapidly escalate the immunopathological risk. However, we stress that currently  
 439 there is no evidence for this hypothesis in *T. molitor*.

440

441 Our work has important implications for the physiological mechanisms of ageing in  
 442 insects. Our data reveal a baseline reduction in MT functioning with age, even in the  
 443 absence of immune activation. This may indicate an age-dependent trade-off between  
 444 investment in immune function and prevention of its immunopathological costs. It is  
 445 possible that such increases in immunopathological damage to vital organs (even  
 446 without infection) could be a key feature of senescence. However, we lack direct  
 447 empirical evidence for this hypothesis. Further manipulative experiments are thus  
 448 necessary to test whether experimental suppression of inflammatory pathways (e.g.  
 449 RNAi of PO response in insects) results in limited reduction of MT activity in older  
 450 uninfected individuals, in turn reducing their mortality. We also found that after  
 451 infection, MTs of older beetles almost stopped functioning (~95% reduction). We  
 452 thus propose that older beetles succumb to infection faster than younger beetles due to  
 453 the inability of damaged MTs to effectively maintain physiological homeostasis.

454

455 Finally, our work also has important implications for the evolution of maladaptive  
 456 immune pathology in natural populations. Natural selection might be almost blind to  
 457 self-damage associated with immune response, because the costs are usually paid at a  
 458 later stage in life (21). From a public health perspective, such relaxed selection can  
 459 pose a serious problem to an ageing human population, potentially exacerbating the  
 460 autoimmune disease crisis worldwide (1, 41, 42). We suggest that intimate  
 461 connections between immune action and immunopathology may drive these  
 462 hallmarks of ageing. We hope that our observations encourage further empirical work  
 463 for a deeper understanding of life history tradeoffs and fitness impacts associated with  
 464 immune function and its immunopathological outcome. These are necessary to  
 465 understand how and why maladaptive immunopathological features of an immune

466 system have evolved.

467

## 468 **ACKNOWLEDGEMENTS**

469

470 We are grateful to Dino McMahon, Caroline Zanchi, Saurabh Mahajan and Vrinda

471 Ravi Kumar for feedback on the manuscript. We thank Jayjit Das, Arun Prakash,

472 Caroline Zanchi and Dipendra Nath Basu for their help during experiments and data

473 analysis. We acknowledge funding and support from the Centre for International

474 Collaboration, Free University of Berlin; DAAD and SERB-DST Young Investigator

475 Grant supplements to IK; the National Centre for Biological Sciences, India; a DST

476 Inspire Faculty fellowship to DA; and European Research Council (EVORESIN)

477 grant supplement to JR.

478

479

480

481

482

483

484

485

486

487

488

489

490

## 491 FIGURE LEGENDS

492 **Figure 1.** Impact of RNAi-mediated knockdown of pro-phenoloxidase transcripts on  
 493 (A) phenoloxidase (PO) response and (B) Malpighian tubule activity, serving as a  
 494 proxy for immunopathological damage, measured at day 4 post-immune challenge  
 495 (i.e. day 11 post-emergence). PO activity was measured as  $V_{max}$  of the enzymatic  
 496 reaction with L-DOPA substrate. Malpighian tubule activity was measured as the rate  
 497 of fluid secretion. Significantly different groups are indicated by distinct alphabets  
 498 (based on Tukey's HSD/ Steel-Dwass test). Control= Unhandled control beetles, EI=  
 499 Early immune challenged control beetles, PO1= RNAi of PO1 transcript followed by  
 500 an early-inflammation, PO2= RNAi of PO2 transcript followed by an early  
 501 inflammation.

502

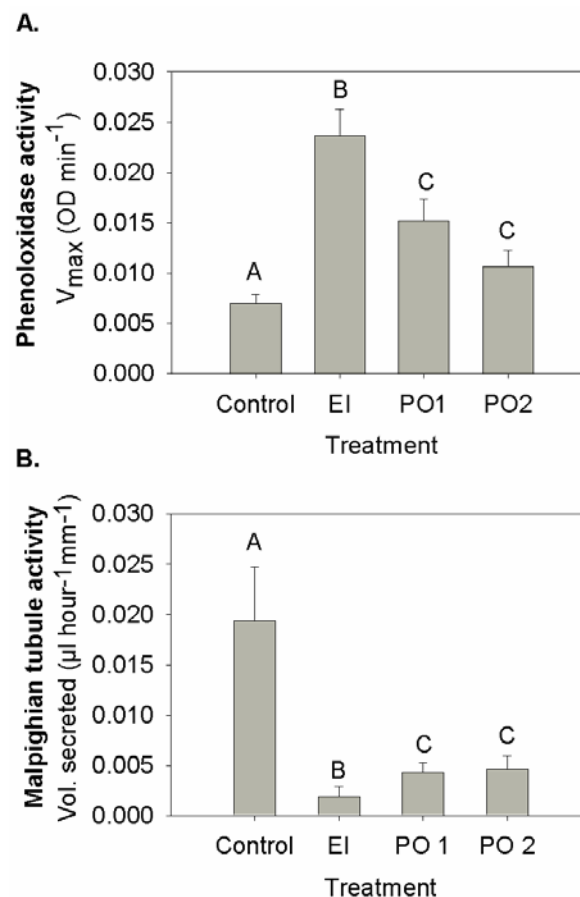

503

504 **Figure 2. (A)** Survival curves of adults after an early immune challenge that induced  
 505 inflammation. **(B)** Impact of phenoloxidase knockdown on median lifespan. Survival  
 506 of each experimental group was compared with the unhandled control group using an  
 507 accelerated failure time model. The c-parameter denotes the effect of the immune  
 508 challenge treatment on survival, averaged over total survival time. Error bars  
 509 represent 95% confidence intervals. **(C)** Impact of phenoloxidase knockdown on  
 510 maximum lifespan. ‘Ageing acceleration’ on the y-axis denotes the reduction in  
 511 maximum lifespan caused by immune challenge treatments (the percentage of  
 512 survivors to the 90th percentile survival time in the full control group/ the percentage  
 513 of survivors to the 90th percentile survival time in the experimental group). Control =  
 514 Unhandled control beetles, PC= Procedural control, EI= Early inflammation control  
 515 beetles, PO1= RNAi of PO1 transcript followed by an early inflammation, PO2=  
 516 RNAi of PO2 transcript followed by an early inflammation.  
 517  
 518

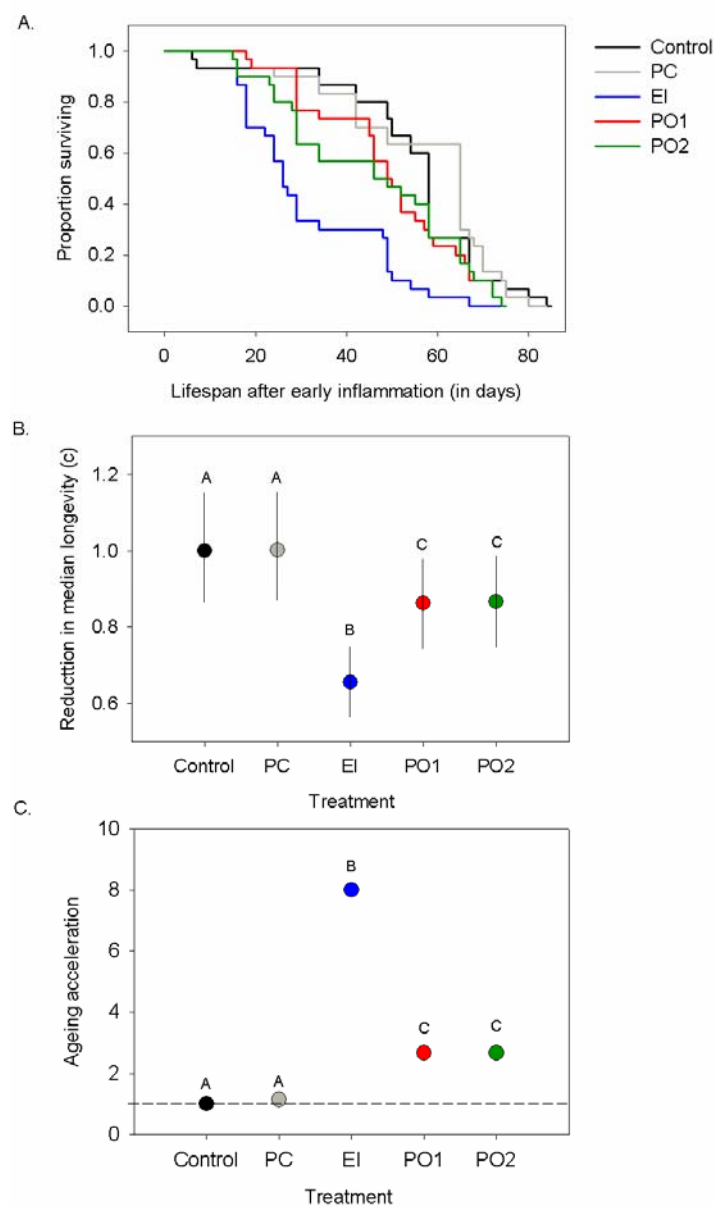

519

520

521

522

523

524

525

526

**Figure 3. (A-F)** Impact of age on (A) bacterial clearance at different time points after infection (B) hemolymph antibacterial activity of infected beetles at different time points (C) phenoloxidase (PO) response of naïve beetles (D) expression of antimicrobial peptide genes *attacin* and *tenecin-1* in naïve beetles relative to an internal control (*rpl27a*) (E) post-infection survival, & (F) Malpighian tubule activity after bacterial infection. **(G-H)** Effect of RNA interference of PO1 transcript on (G) immunopathological damage to Malpighian tubules, & (H) post-infection survival in older beetles. Bacterial clearance was measured as  $\log_{10}$  of CFUs (colony forming units) recovered from perfused hemolymph after injection of *S. aureus* cells into each beetle. Hemolymph antibacterial activity was measured as the number of *S. aureus* cells recovered after 2 hours of exposure to beetle hemolymph. PO response and immunopathology were measured as described in Figure 1. Significantly different groups are indicated by distinct alphabets (based on Tukey's HSD/ Steel-Dwass test). For panels A, B and D, alphabet assignments are meaningful only within each time point (or gene) (partitioned by dashed vertical lines), and are not comparable across time points (or genes). Y = Young beetles; O = Old beetles; YSI = Young sham-infected beetles, OSI = Old sham-infected beetles, YI = Young infected beetles, OI = Old infected beetles, PC = Sham infection with insect Ringer; I = *S. aureus* infection; RNAi + I = RNAi followed by *S. aureus* infection.



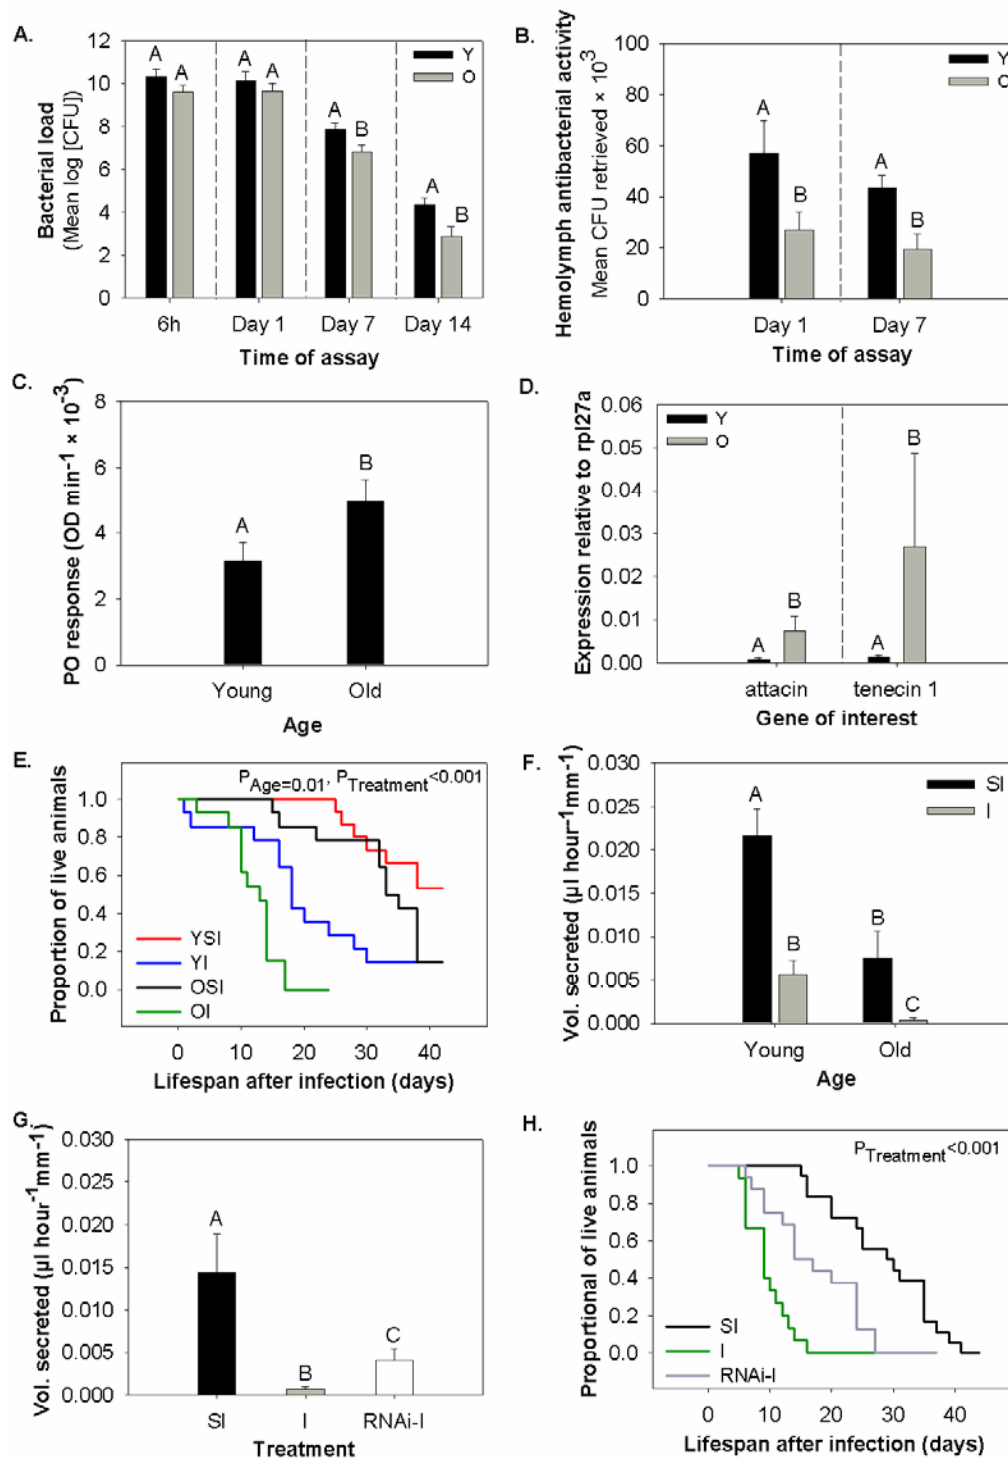

551

552

553

## 554 REFERENCES:

- 555 1. Bach J-F (2002) The effect of infections on susceptibility to autoimmune and  
556 allergic diseases. *N Engl J Med* 347(12):911–920.
- 557 2. Dye C, Scheele S, Dolin P, Pathania V, Raviglione M (1999) Global burden of  
558 tuberculosis: Estimated incidence, prevalence, and mortality by country. *JAMA*  
559 282(7):677–686.
- 560 3. Bekker L-G, Moreira A-L, Bergtold A, Freeman S, Ryffel B, Kaplan G (2000)  
561 Immunopathologic effects of tumor necrosis factor alpha in murine  
562 mycobacterial infection are dose dependent. *Infect Immun* 68(12):6954–6961.
- 563 4. Urabe K, Aroca P, Tsukamoto K, Mascagna D, Palumbo A, Prota G, Hearing  
564 V-J (1994) The inherent cytotoxicity of melanin precursors: A revision.  
565 *Biochim Biophys Acta - Mol Cell Res* 1221(3):272–278.
- 566 5. Nappi A-J, Vass E, Frey F, Carton Y (1995) Superoxide anion generation in  
567 *Drosophila* during melanotic encapsulation of parasites. *Eur J Cell Biol*  
568 68(4):450–456.
- 569 6. Zhao P, Lu Z, Strand M, Jiang H (2008) Antiviral, antiparasitic, and cytotoxic  
570 effects of 5,6- dihydroxyindole (DHI), a reactive compound generated by  
571 phenoloxidase during insect immune response. *Insect Biochem Mol Biol*  
572 141(4):520–529.
- 573 7. Finch C-E, Crimmins E-M (2004) Inflammatory exposure and historical  
574 changes in human life-spans. *Science* 305(5691):1736–1739.
- 575 8. Pursall E-R, Rolff J (2011) Immune responses accelerate ageing: Proof-of-

- 576 principle in an insect model. *PLoS One* 6(5): e19972.
- 577 9. Davies S-A, Overend G, Sebastian S, Cundall M, Cabrero P, Dow J-A, Terhzaz  
578 S (2012) Immune and stress response “cross-talk” in the *Drosophila*  
579 Malpighian tubule. *J Insect Physiol* 58(4):488–497.
- 580 10. Pacheco C, Alevi K, Ravazi A, M-T-V-A Oliveira (2014) Review: Malpighian  
581 tubule, an essential organ for insects. *Entomol Ornithol Herpetol Curr Res*  
582 3(02):2–4.
- 583 11. Cerenius L, Lee BL, Söderhäll K (2008) The proPO-system: pros and cons for  
584 its role in invertebrate immunity. *Trends Immunol* 29(6):263–71.
- 585 12. Sadd B-M, Siva-Jothy M-T (2006) Self-harm caused by an insect’s innate  
586 immunity. *Proc Biol Sci B* 273(1600):2571–4.
- 587 13. De Gregorio E, Han S-J, Lee W-J, Baek M-J, Osaki T, Kawabata S, Lee B-L,  
588 Iwanaga S, Lemaitre B, Brey P-T (2002) An immune-responsive Serpin  
589 regulates the melanization cascade in *Drosophila*. *Dev Cell* 3(4):581–592.
- 590 14. Ayres J-S, Schneider D-S (2008) A signaling protease required for  
591 melanization in *Drosophila* affects resistance and tolerance of infections. *PLoS*  
592 *Biol* 6(12):2764–2773.
- 593 15. Deveale B, Brummel T, Seroude L (2004) Immunity and aging□: the enemy  
594 within□? *Aging Cell* 3(4):195–208.
- 595 16. Shanley D-P, Aw D, Manley N-R, Palmer D-B (2009) An evolutionary  
596 perspective on the mechanisms of immunosenescence. *Trends immunol* 30(7):  
597 374-381.

- 598 17. Licastro F, Candore G, Lio D, Porcellini E, Colonna-Romano G, Franceschi  
599 C, Caruso C (2005) Innate immunity and inflammation in ageing: a key for  
600 understanding age-related diseases. *Immun Ageing* 2:8.
- 601 18. Zerofsky M, Harel E, Silverman N, Tatar M (2005) Aging of the innate  
602 immune response in *Drosophila melanogaster*. *Aging Cell*:103–108.
- 603 19. Khan I, Prasad NG (2013) The aging of the immune response in *Drosophila*  
604 *melanogaster*. *J Gerontol A Biol Sci Med Sci* 68(2):129–35.
- 605 20. Khan I, Prakash A, Agashe D (2015) Immunosenescence and the ability to  
606 survive bacterial infection in the red flour beetle *Tribolium castaneum*. *J Anim*  
607 *Ecol* 85:291–301.
- 608 21. Hamilton WD (1966) The moulding of senescence by natural selection. *J Theor*  
609 *Biol* 12(1):12–45.
- 610 22. Mueller L, Rose M (1996) Evolutionary theory predicts late-life mortality  
611 plateaus. *Evolution* 50(26):15249–15253.
- 612 23. Haine E, Moret Y, Siva-jothy M, Rolff J (2008) Antimicrobial defence and  
613 persistent infection in insects. *Science* 322(21):1257–1259.
- 614 24. Dobson A-J, Johnston PR, Vilcinskas A, Rolff J (2012) Identification of  
615 immunological expressed sequence tags in the mealworm beetle *Tenebrio*  
616 *molitor*. *J Insect Physiol* 58(12):1556–1561.
- 617 25. Johnston P-R, Rolff J (2015) Host and symbiont jointly control gut microbiota  
618 during complete metamorphosis. *PLoS Pathog* 11(11): e1005246.

- 619 26. Schmittgen T-D, Livak KJ (2008) Analyzing real-time PCR data by the  
620 comparative CT method. *Nat Protoc* 3(6):1101–1108.
- 621 27. Maddrell S-H, Overton J-A (1990) Transport in insect Malpighian tubules.  
622 *Methods Enzymol* 192(1958):617–632.
- 623 28. Neufeld D-S, Leader J-P (1998) Cold inhibition of cell volume regulation  
624 during the freezing of insect Malpighian tubules. *J Exp Biol* 201:2195–2204.
- 625 29. Nicolson S (1992) Excretory function in *Tenebrio molitor*: Fast tubular  
626 secretion in a vapour-absorbing insect. *J Insect Physiol* 38(2):139–146.
- 627 30. Wiehart U-I-M, Nicolson S-W, Eigenheer R-A, Schooley D-A (2002)  
628 Antagonistic control of fluid secretion by the Malpighian tubules of *Tenebrio*  
629 *molitor*: Effects of diuretic and antidiuretic peptides and their second  
630 messengers. *J Exp Biol* 501:493–501.
- 631 31. Zanchi C, Troussard J, Martinaud G (2011) Differential expression and costs  
632 between maternally and paternally derived immune priming for offspring in an  
633 insect. *J Anim Ecol* 80:1174–1183.
- 634 32. Swindell W-R (2010) Accelerated failure time models provide a useful  
635 statistical framework for ageing research. *Exp Gerontol* 44(3):190–200.
- 636 33. Patel K, Kay R, Rowell L (2006) Comparing proportional hazards and  
637 accelerated failure time models: an application in influenza. *Pharm Stat*  
638 5(3):213–224.
- 639 34. Wang C, Li Q, Redden D-T, Weindruch R, Allison D-B (2004) Statistical  
640 methods for testing effects on “maximum lifespan.” *Mech Ageing Dev*

- 641 125(9):629–632.
- 642 35. Brandt S-M, Dionne M-S, Khush R-S, Pham L-N, Vigdal T-J, Schneider D  
643 (2004) Secreted bacterial effectors and host-produced eiger/TNF drive death  
644 in a *Salmonella*-infected fruit fly. *PLoS Biol* 2(12): e418.
- 645 36. Stout-Delgado H-W, Du W, Shirali A-C, Booth C-J, Goldstein D-R (2009)  
646 Aging promotes neutrophil-induced mortality by augmenting IL-17 production  
647 during viral infection. *Cell Host Microbe* 6(5):446–456.
- 648 37. Corby-Harris V, Habel K-E, Ali F-G, Promislow D-E-L (2007) Alternative  
649 measures of response to *Pseudomonas aeruginosa* infection in *Drosophila*  
650 *melanogaster*. *J Evol Biol* 20(2):526–33.
- 651 38. Ramsden S, Cheung Y-Y, Seroude L (2008) Functional analysis of the  
652 *Drosophila* immune response during aging. *Aging Cell* 7(2):225–236.
- 653 39. Vasto S, Candore G, Balistreri C-R, Caruso M, Colonna-Romano G, Grimaldi  
654 M-P, Listi F, Nuzzo D, Lio D, Caruso C (2007) Inflammatory networks in  
655 ageing, age-related diseases and longevity. *Mech Ageing Dev* 128(1):83–91.
- 656 40. Belloni V, Faivre B, Guerreiro R, Arnoux E, Bellenger J, Sorci G (2010)  
657 Suppressing an anti-inflammatory cytokine reveals a strong age-dependent  
658 survival cost in mice. *PLoS One* 5(9): e12940.
- 659 41. Zacccone P, Fehervari Z, Phillips J-M, Dunne D-W, Cooke A (2006) Parasitic  
660 worms and inflammatory diseases. *Parasite Immunol* 28(10):515–523.
- 661 42. Finch C-E (2010) Evolution of the human lifespan and diseases of aging: roles  
662 of infection, inflammation, and nutrition. *Proc Natl Acad Sci USA* 107 Suppl

663 1:1718–1724.

664

665

**A.**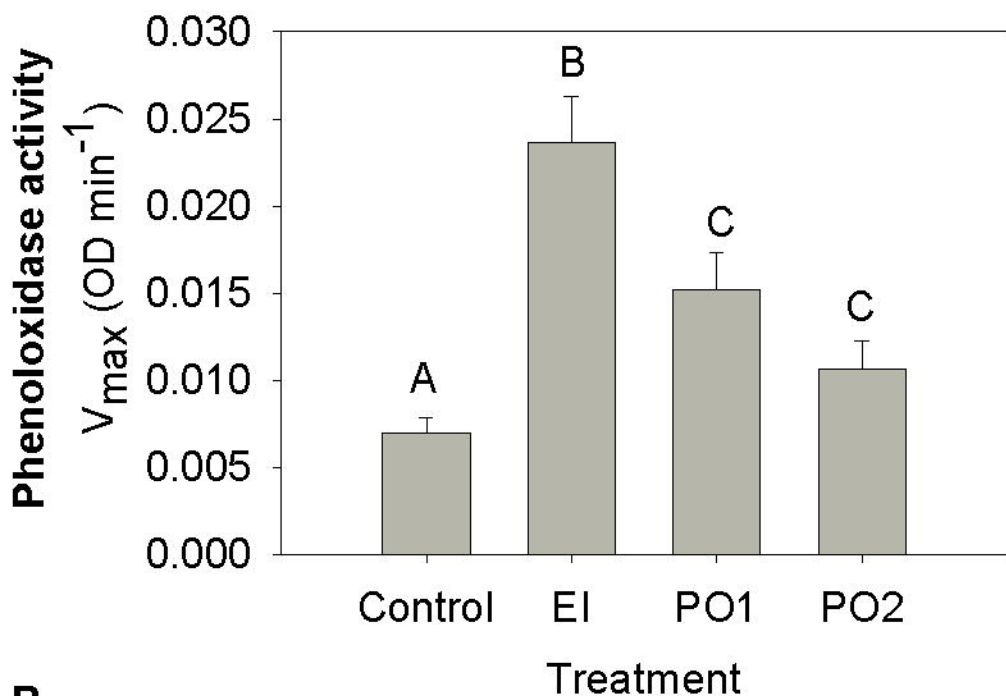**B.**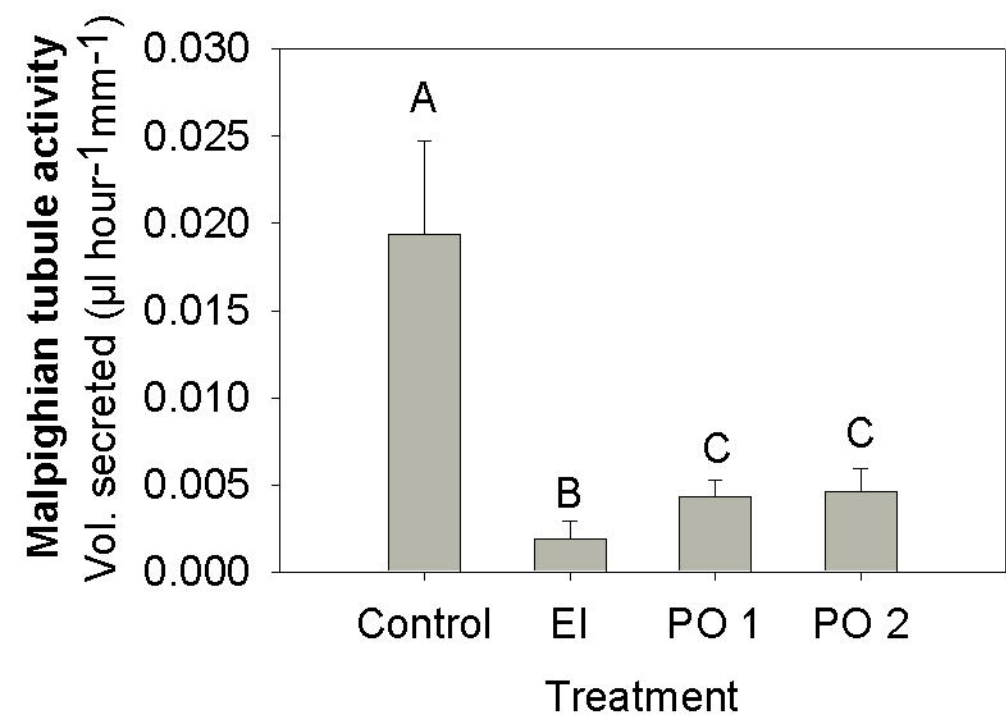



A.

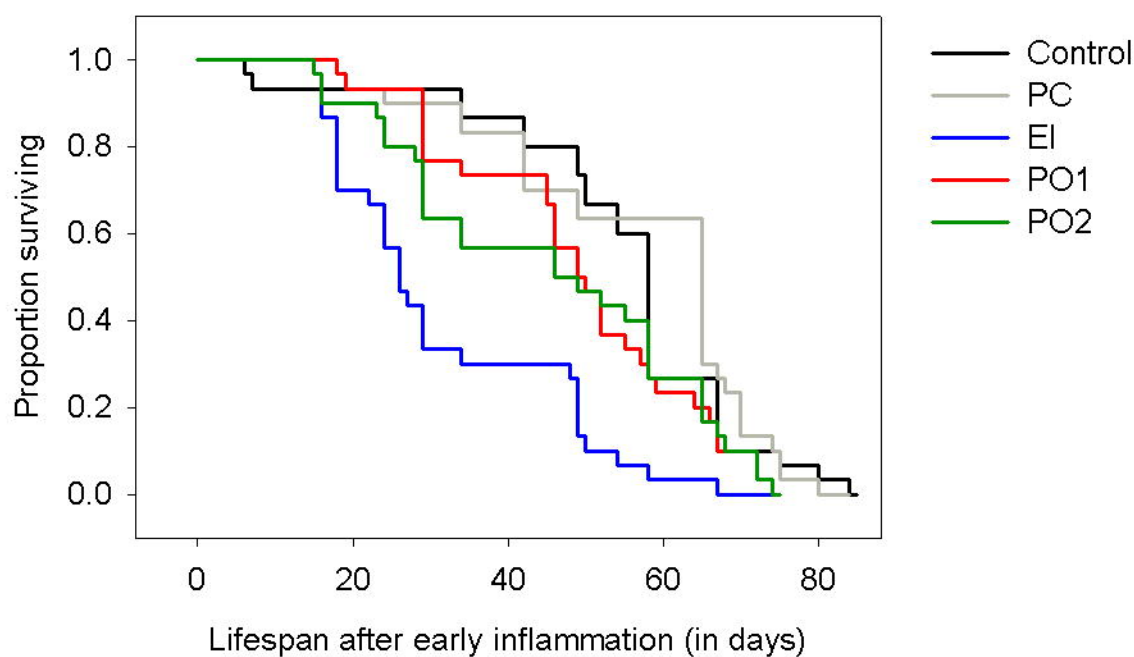

B.

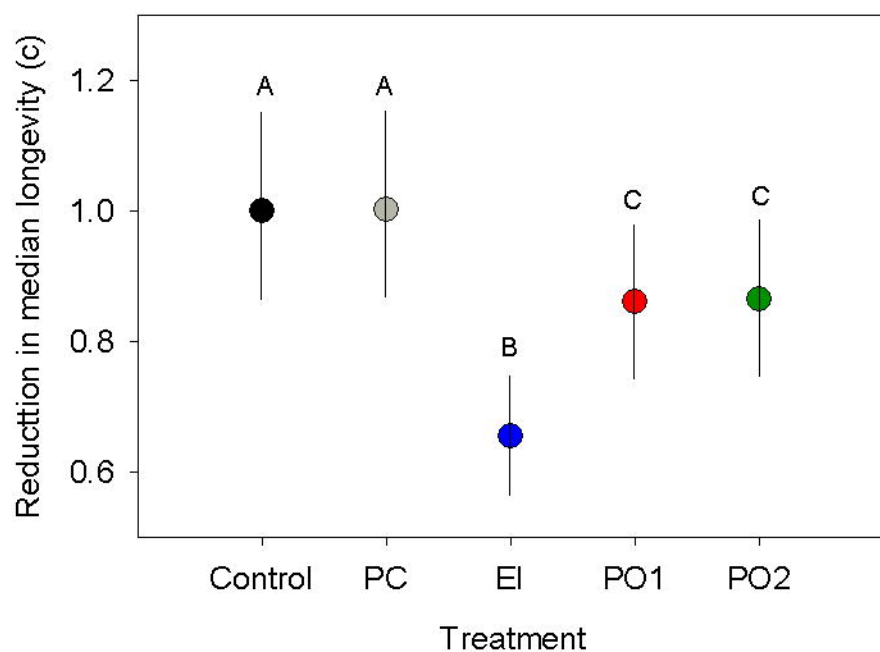

C.

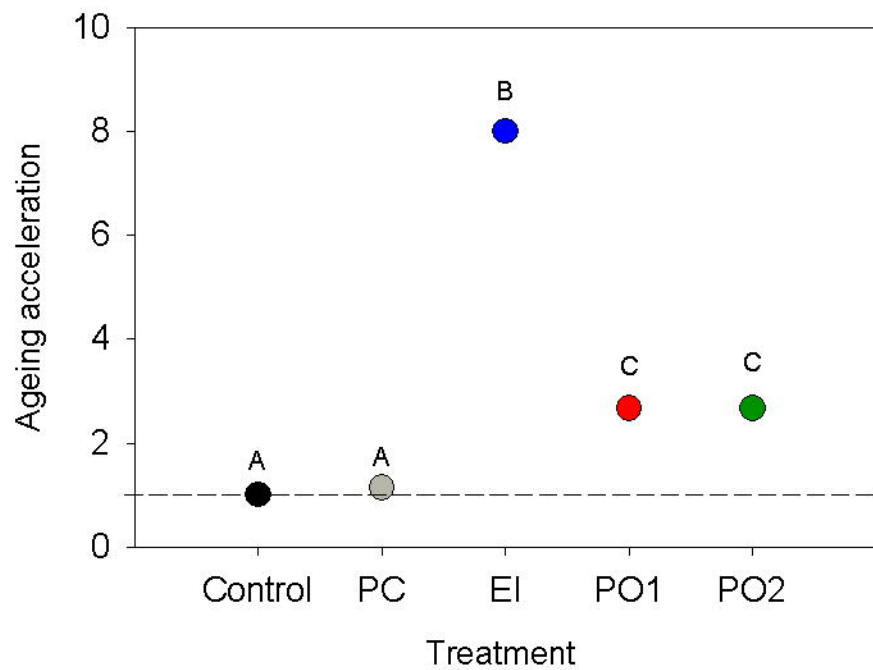

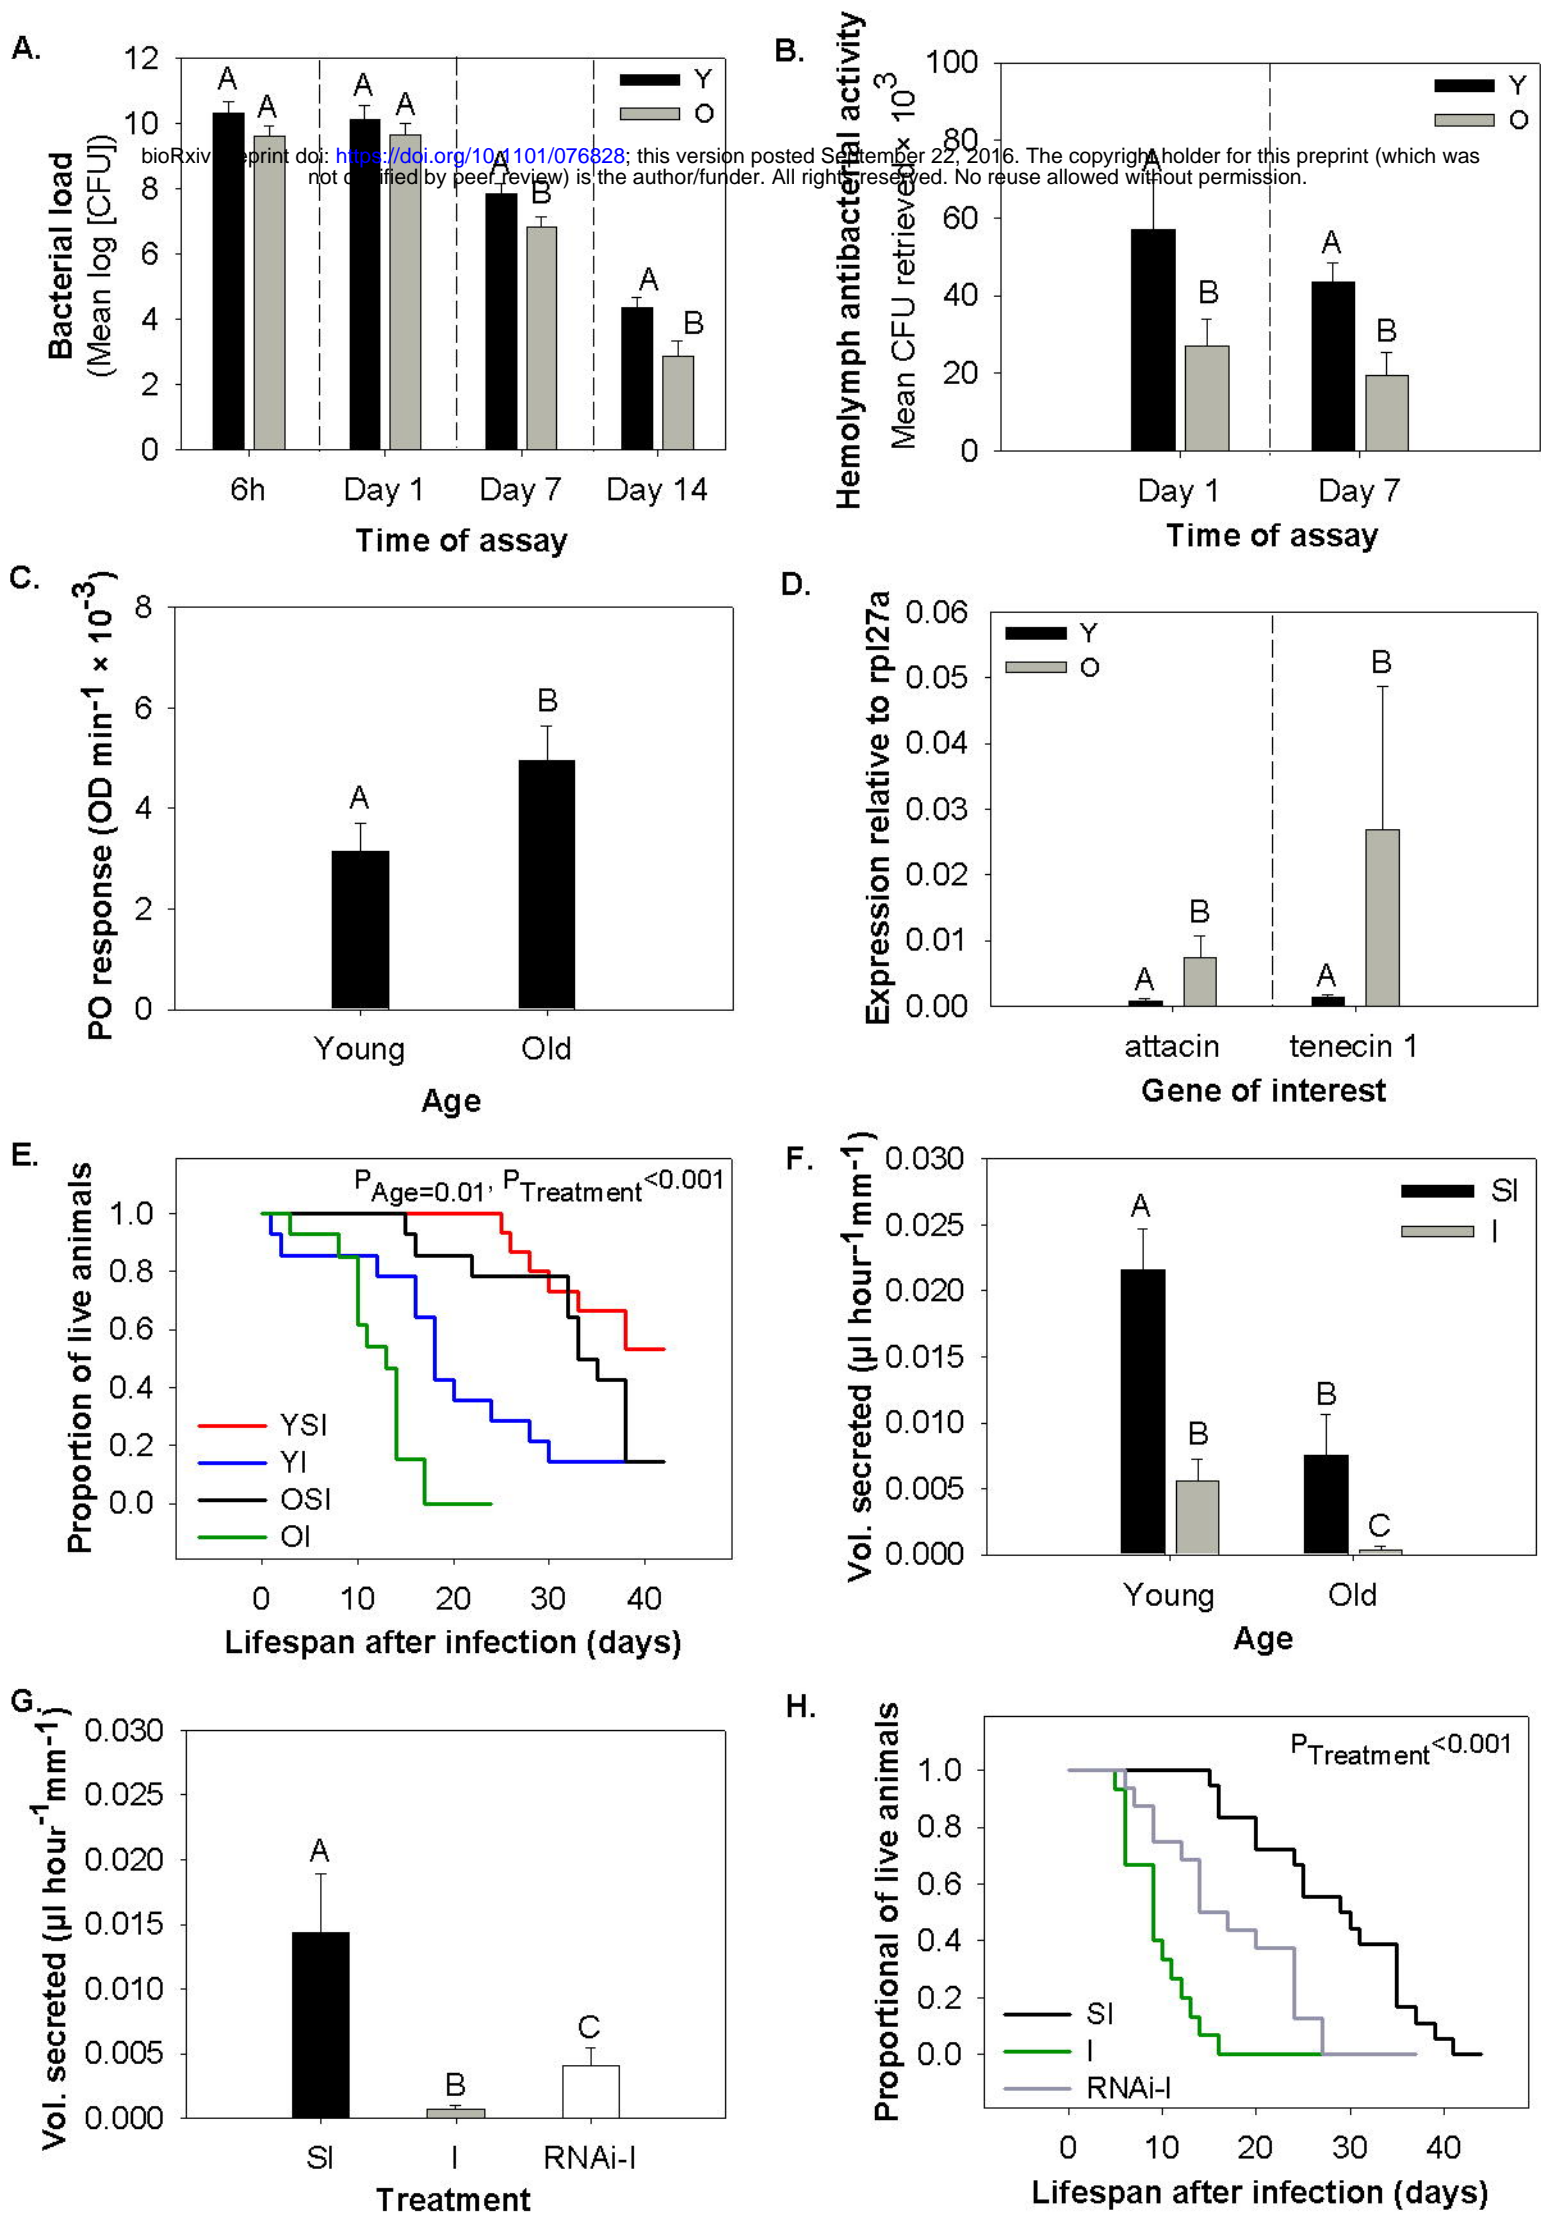

Source: http://biorxiv.org/content/10.1101/076828v1.full.pdf
